# Supplementary material
Source: Springer Nature journal article supplement (https://www.springermedizin.de/resource/supplementary/13054_2010_8589_MOESM3_ESM.pdf/9732314)
Supplement: MOESM3 [file 9732314]

Figure 1, Number of hospitals with specific orders of interventions and timing of questionnaires

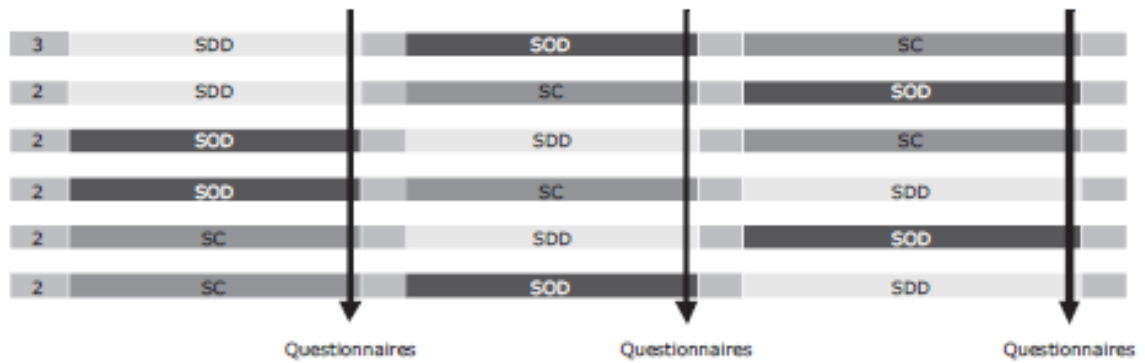

SDD Selective Decontamination of the Digestive tract, SOD Selective Oropharyngeal Decontamination, SC Standard Care  
 Each row is a possible study order after cluster randomization, The numbers at the left represent the hospitals with the subsequent study order. The black arrows represent the moment at which the questionnaires were sent out.
